# Supplementary material for: Genetic polymorphisms of Bcl-2 promoter in cancer susceptibility and prognosis: a meta-analysis
Source: PubMed Central journal article supplement (PMC5421928; doi:10.18632/oncotarget.15751), 2017-02-27
Supplement: oncotarget-08-25270-s001.pdf [file oncotarget-08-25270-s001.pdf]

# Genetic polymorphisms of Bcl-2 promoter in cancer susceptibility and prognosis: a meta-analysis

## SUPPLEMENTARY MATERIALS

### SUPPLEMENTARY FIGURES AND TABLES

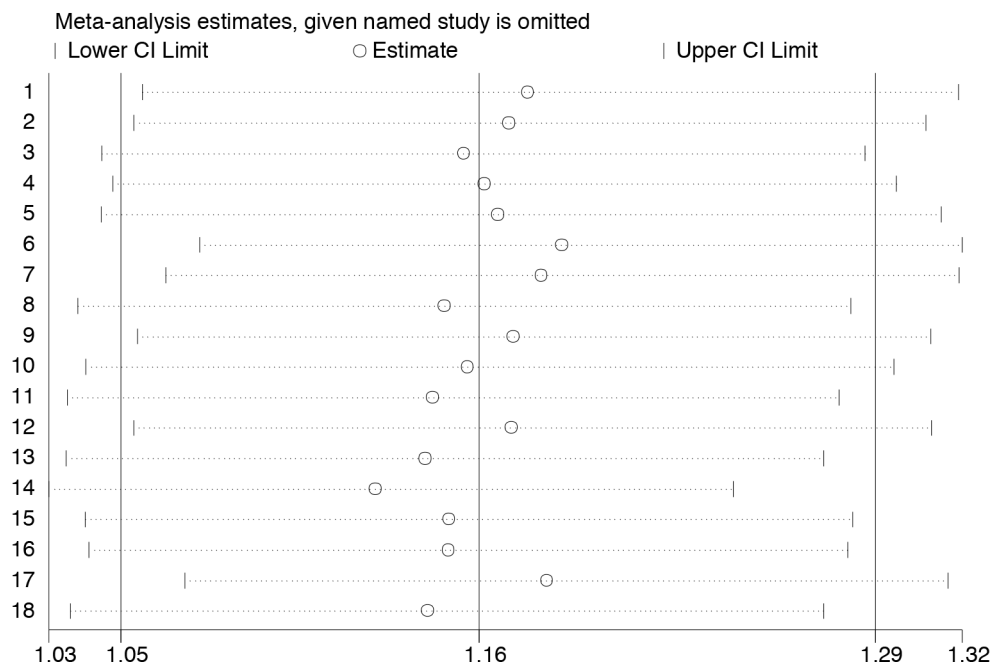

Supplementary Figure 1: Forest plots of sensitivity analysis for the meta-analysis of rs2279115 and cancer risk in allelic (C vs. A) model.

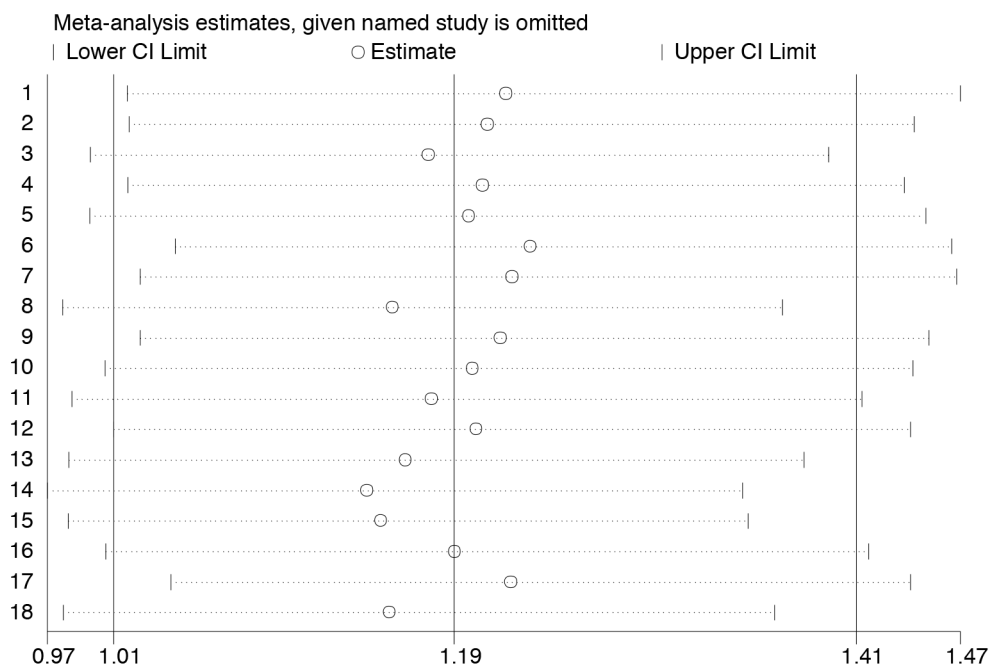

Supplementary Figure 2: Forest plots of sensitivity analysis for the meta-analysis of rs2279115 and cancer risk in dominant (CC+ CA vs. AA) model.

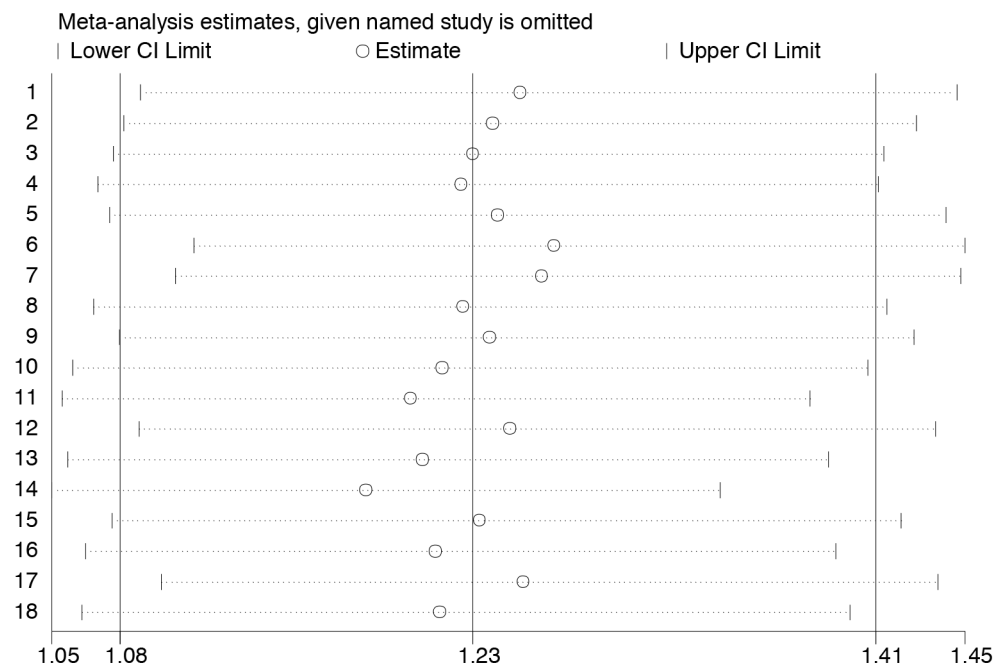

Supplementary Figure 3: Forest plots of sensitivity analysis for the meta-analysis of rs2279115 and cancer risk in recessive (CC vs. CA+AA) model.

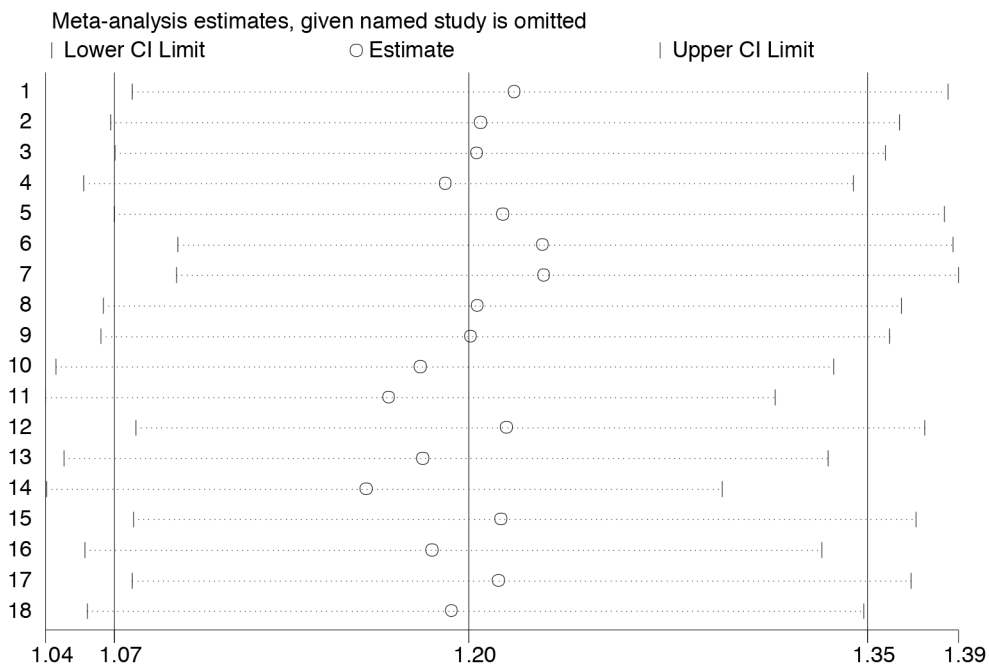

Supplementary Figure 4: Forest plots of sensitivity analysis for the meta-analysis of rs2279115 and cancer risk in additive (CC vs. CA) model.

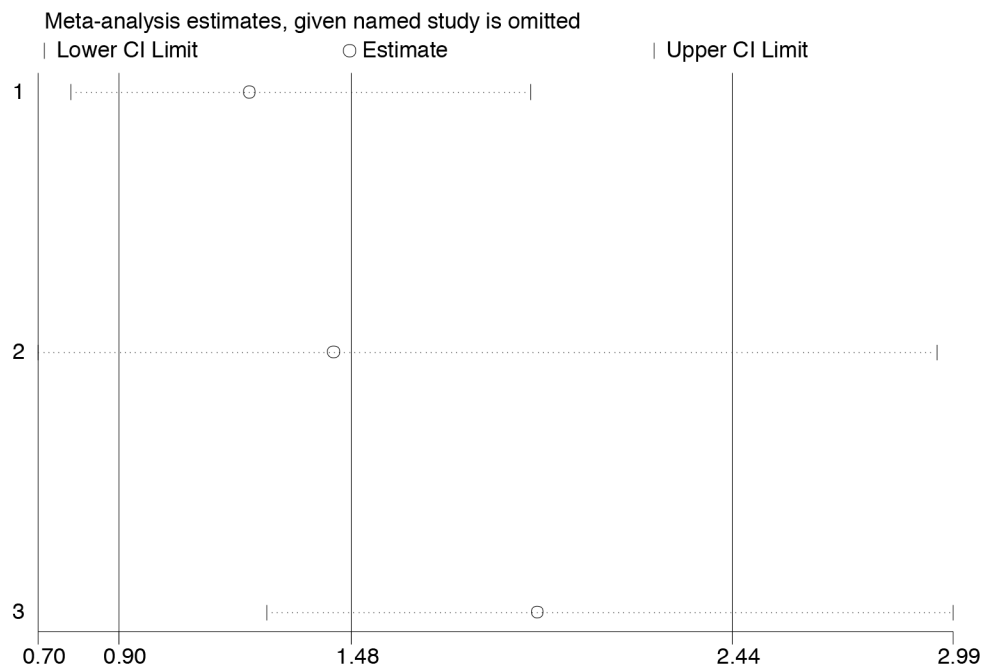

Supplementary Figure 5: Forest plots of sensitivity analysis for the meta-analysis of rs1801018 and cancer risk in allelic (A vs. G) model.

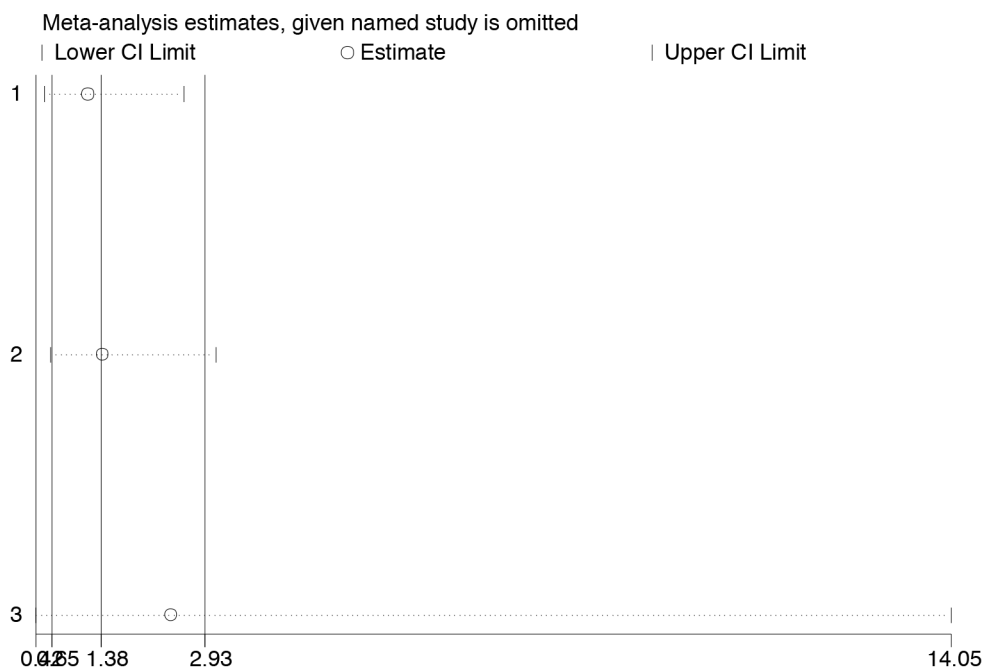

Supplementary Figure 6: Forest plots of sensitivity analysis for the meta-analysis of rs1801018 and cancer risk in dominant (AA+AG vs. GG) model.

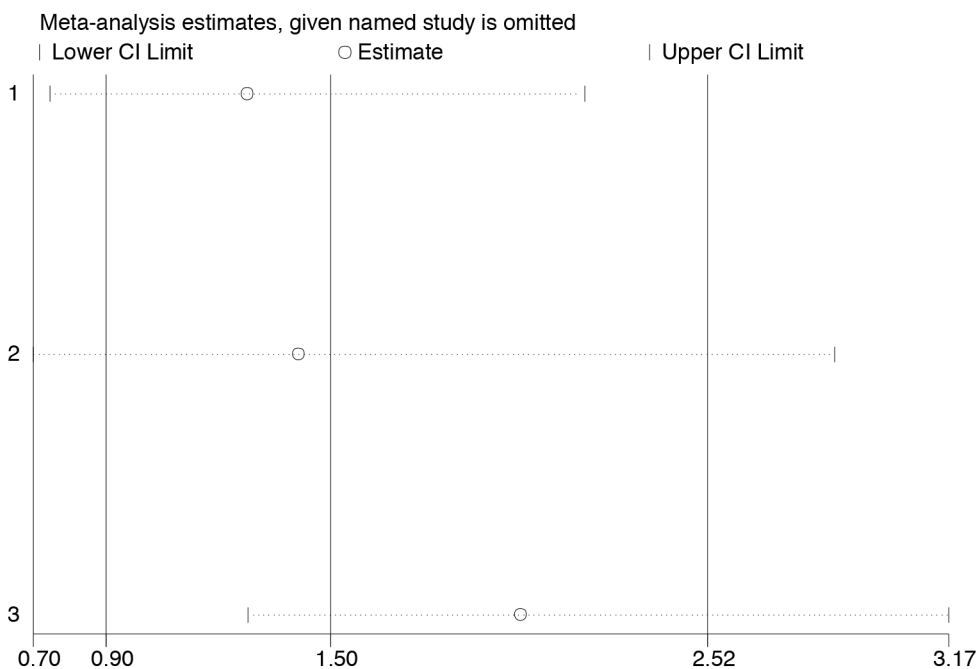

Supplementary Figure 7: Forest plots of sensitivity analysis for the meta-analysis of rs1801018 and cancer risk in recessive (AA vs. AG+GG) model.

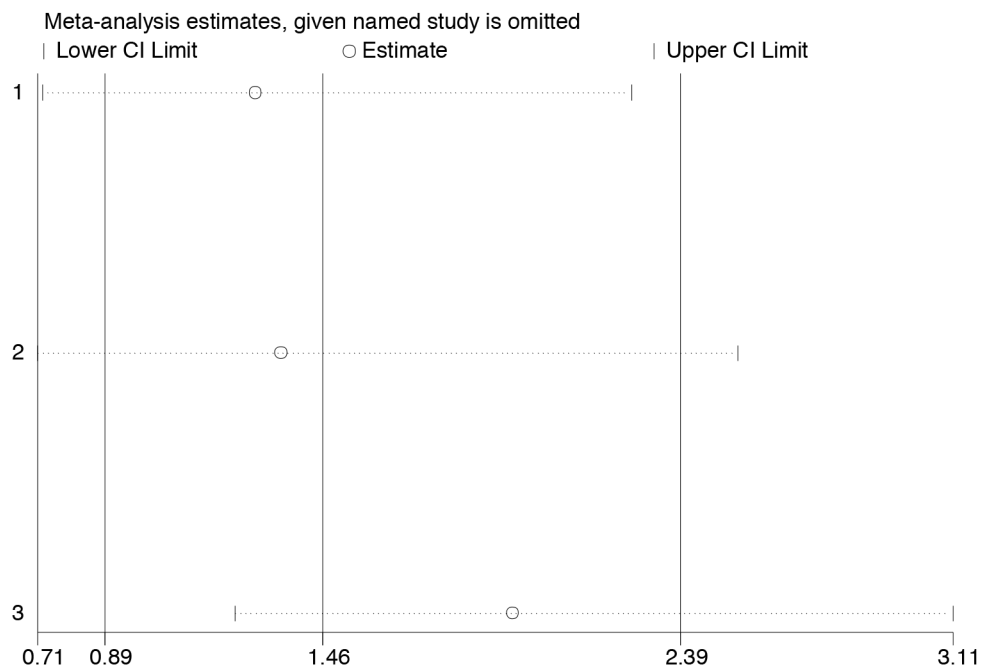

**Supplementary Figure 8: Forest plots of sensitivity analysis for the meta-analysis of rs1801018 and cancer risk in additive (AA vs. AG) model.**

**Supplementary Table 1: Characteristics of studies included in this meta-analysis.**

**See Supplementary File 1**

Supplementary Table S2: Genotype frequencies of rs2279115 included in this meta-analysis

| Author             | Case |     |     | Control |     |     | MAF  |         | HWE   |
|--------------------|------|-----|-----|---------|-----|-----|------|---------|-------|
|                    | CC   | CA  | AA  | CC      | CA  | AA  | Case | Control |       |
| Chen K             | 226  | 382 | 206 | 257     | 446 | 231 | 0.51 | 0.51    | 0.18  |
| Zenz T             | 123  | 194 | 73  | 36      | 63  | 21  | 0.45 | 0.56    | 0.47  |
| Fingas CD          | 14   | 21  | 5   | 12      | 18  | 10  | 0.61 | 0.53    | 0.54  |
| Eun YG             | 40   | 37  | 15  | 80      | 109 | 33  | 0.64 | 0.61    | 0.68  |
| Liu Z              | 75   | 96  | 34  | 96      | 112 | 16  | 0.60 | 0.68    | 0.03  |
| Searle CJ          | 314  | 477 | 189 | 290     | 475 | 216 | 0.56 | 0.54    | 0.41  |
| Meyer A            | 146  | 259 | 104 | 152     | 238 | 76  | 0.54 | 0.58    | 0.29  |
| Xu P               | 378  | 483 | 156 | 393     | 479 | 145 | 0.61 | 0.62    | 0.96  |
| Wang WL            | 147  | 198 | 79  | 191     | 223 | 32  | 0.58 | 0.68    | 0.002 |
| Li W               | 128  | 105 | 19  | 109     | 103 | 36  | 0.72 | 0.65    | 0.15  |
| Oliveira C         | 64   | 90  | 46  | 64      | 107 | 44  | 0.55 | 0.55    | 0.95  |
| Cingeetham A       | 144  | 47  | 30  | 229     | 37  | 39  | 0.76 | 0.81    | 0.00  |
| Pan W(H)           | 242  | 265 | 80  | 198     | 312 | 90  | 0.64 | 0.59    | 0.07  |
| Pan W(J)           | 416  | 453 | 131 | 312     | 516 | 172 | 0.64 | 0.57    | 0.10  |
| Fernandes AT       | 67   | 111 | 53  | 83      | 132 | 68  | 0.53 | 0.53    | 0.28  |
| Yang X(H)          | 92   | 92  | 16  | 136     | 208 | 56  | 0.69 | 0.60    | 0.10  |
| Yang X(J)          | 136  | 146 | 38  | 170     | 336 | 134 | 0.65 | 0.53    | 0.18  |
| Bhushann Meka P    | 116  | 81  | 7   | 58      | 38  | 14  | 0.77 | 0.70    | 0.06  |
| Moazami-Goudarzi M | 33   | 18  | 11  | 22      | 27  | 13  | 0.68 | 0.57    | 0.39  |
| Mou X              | 90   | 95  | 15  | 52      | 50  | 27  | 0.69 | 0.60    | 0.03  |
| Zhang Ning         | 42   | 53  | 19  | 46      | 53  | 8   | 0.60 | 0.68    | 0.17  |
| Wang Ying-Xue      | 92   | 102 | 19  | 38      | 58  | 22  | 0.67 | 0.57    | 0.21  |
| Hirata H           | 92   | 83  | 41  | 101     | 72  | 36  | 0.62 | 0.66    | 0.00  |
| Hirata H           | 56   | 67  | 17  | 80      | 62  | 25  | 0.64 | 0.66    | 0.03  |

Supplementary Table 3: Genotype frequencies of rs1801018 included in this meta-analysis

| Author     | Case |     |    | Control |     |    | MAF  |         | HWE  |
|------------|------|-----|----|---------|-----|----|------|---------|------|
|            | AA   | AG  | GG | AA      | AG  | GG | Case | Control |      |
| Meenu Jain | 135  | 16  | 0  | 160     | 38  | 3  | 0.94 | 0.89    | 0.67 |
| Eun YG     | 79   | 12  | 1  | 170     | 49  | 3  | 0.92 | 0.88    | 0.80 |
| Liu Z      | 189  | 11  | 5  | 194     | 24  | 6  | 0.95 | 0.92    | 0.00 |
| Xu P       | 855  | 152 | 10 | 864     | 159 | 12 | 0.92 | 0.91    | 0.13 |
| Wang WL    | 376  | 35  | 13 | 377     | 48  | 21 | 0.93 | 0.90    | 0.00 |
